# Supplementary material
Source: publisher figshare collection journal article supplement (https://acs.figshare.com/ndownloader/files/3762841)
Supplement: Supplementary file 1 [file 3762841]

## Supporting Information

### **Monodisperse Nanostructured Spheres of Block Copolymers and Nanoparticles via Cross-Flow Membrane Emulsification**

Jae Man Shin<sup>1†</sup>, Minsoo P. Kim<sup>1,2†</sup>, Hyunseung Yang<sup>1</sup>, Kang Hee Ku<sup>1</sup>, Se Gyu Jang<sup>3</sup>, Kyung Ho Youm<sup>4</sup>, Gi-Ra Yi<sup>\*,2</sup>, and Bumjoon J. Kim<sup>\*,1</sup>

<sup>1</sup> Department of Chemical and Biomolecular Engineering, Korea Advanced Institute of Science and Technology (KAIST), Daejeon, 305-701 Republic of Korea

<sup>2</sup> School of Chemical Engineering, Sungkyunkwan University, Suwon, 440-746 Republic of Korea

<sup>3</sup> Soft Innovative Materials Research Center, Institute of Advanced Composite Materials, Korea Institute of Science and Technology (KIST), Jeonbuk, 565-905, Republic of Korea

<sup>4</sup> Department of Engineering Chemistry, Chungbuk National University, Cheongju, Chungbuk 362-763, Republic of Korea

\*E-mail: bumjoonkim@kaist.ac.kr (B. J. K.), yigira@skku.edu (G. R. Y)

# Table of Contents

## Supplementary Figure S1-7

|                                                                                                                                         |    |
|-----------------------------------------------------------------------------------------------------------------------------------------|----|
| ■ Optical microscope images of initial droplets and BCP particles after solvent evaporation                                             | S1 |
| ■ SEM images of BCP particles prepared at different polymer concentrations                                                              | S2 |
| ■ TEM images of BCP particles consisting of three different symmetric PS- <i>b</i> -PB BCPs with $M_n$ = 112k-104k, 67k-75k and 20k-22k | S3 |
| ■ Comparison of calculated and measured $P_c$ values                                                                                    | S4 |
| ■ SEM images of BCP particles produced from 1.1 $\mu$ m membrane at different stirring speeds                                           | S5 |
| ■ TEM images of oleylamine-capped Au nanoparticles                                                                                      | S6 |

## Supplementary Scheme S1

|                                                             |    |
|-------------------------------------------------------------|----|
| ■ Illustration of the droplet coalescence at higher P value | S1 |
|-------------------------------------------------------------|----|

## Supplementary Tables S1-4

|                                                                                                                              |    |
|------------------------------------------------------------------------------------------------------------------------------|----|
| ■ $L$ , $D/L$ and number of PB layers in onion-like BCP particles consisting of different $M_n$ of PS- <i>b</i> -PB polymers | S1 |
| ■ Particle diameters and their distributions produced at different P values                                                  | S2 |
| ■ Particle diameters and their distributions produced at different SDS concentrations.                                       | S3 |
| ■ Particle diameters and their distributions produced at different stirring speeds                                           | S4 |

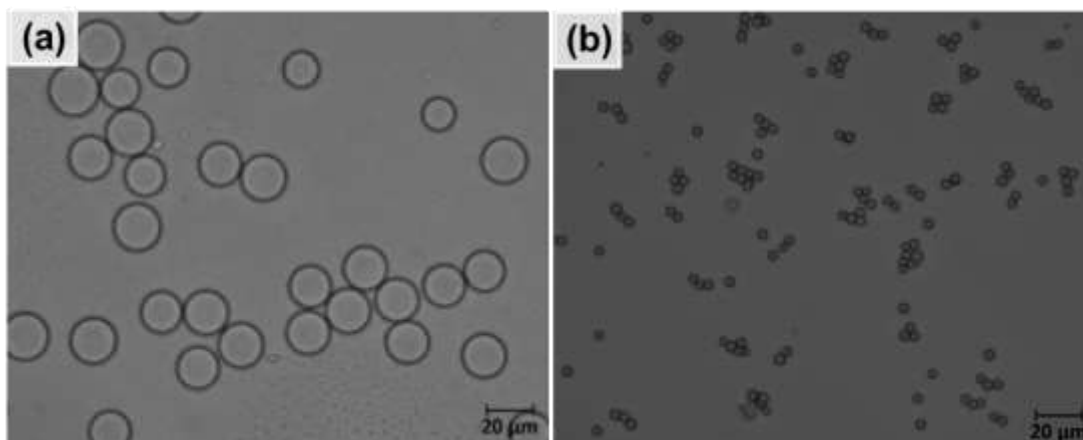

**Figure S1.** Optical microscope images of (a) emulsion droplets before solvent evaporation and (b) BCP particles after solvent evaporation. The emulsion droplets were produced using 5.1  $\mu\text{m}$  membrane. The average diameters were measured to be (a)  $18.365 \pm 1.779 \mu\text{m}$  and (b)  $4.086 \pm 0.322 \mu\text{m}$ . The concentration of SDS was 0.5 wt%.

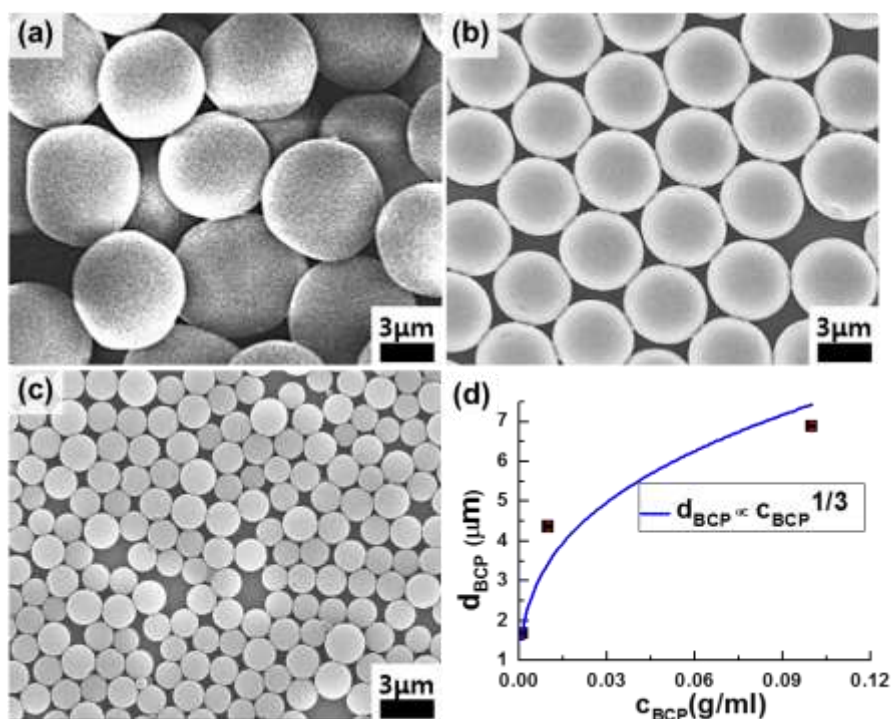

**Figure S2.** SEM images of BCP particles prepared at different polymer concentrations using 5.1 μm membrane: (a) 0.1 g/mL; (b) 0.01 g/mL; (c) 0.001 g/mL. The average diameters of the BCP particles were determined to be (a)  $6.890 \pm 0.603$  μm, (b)  $4.366 \pm 0.370$  μm, and (c)  $1.679 \pm 0.172$  μm, respectively. (d) Sizes of the BCP particles as a function of the  $c_{BCP}$  values; the blue line represents  $d_{BCP} \propto \sqrt[3]{c_{BCP}}$ . The particles with high  $c_{BCP}$  of 0.1 g/mL did not have perfect spherical shapes.

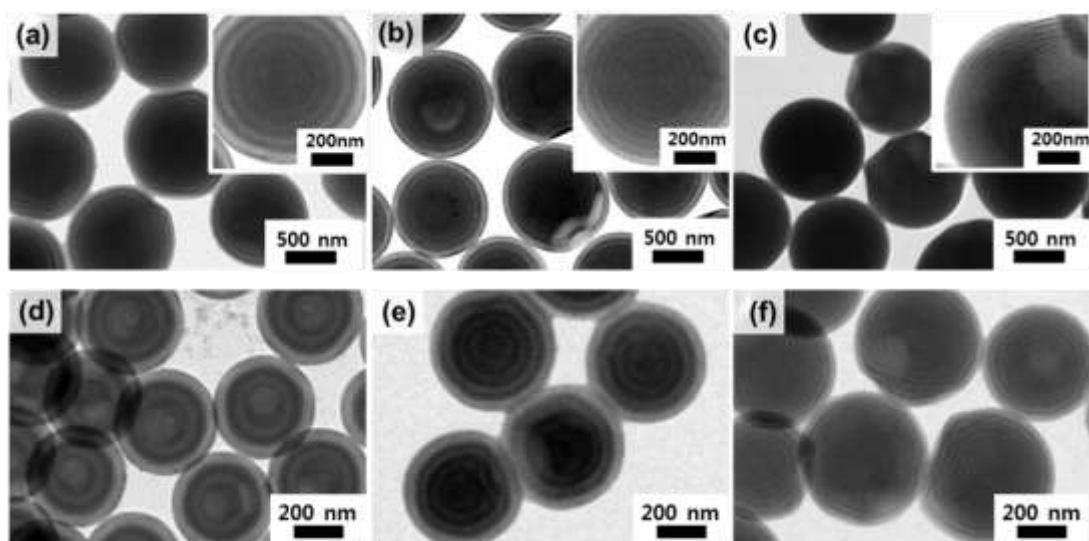

**Figure S3.** TEM images of BCP particles consisting of three different PS-*b*-PB BCPs with  $M_n$ = (a, d) 112k-104k; (b, e) 67k-75k; (c, f) 20k-22k. The BCP particles were produced from 1.1  $\mu\text{m}$  membrane ((a), (b), (c)) and 0.5  $\mu\text{m}$  membrane ((d), (e), (f)), respectively. The inset images are magnified ones corresponding to each of (a-c). The PB domain appears dark due to  $\text{OsO}_4$  staining.

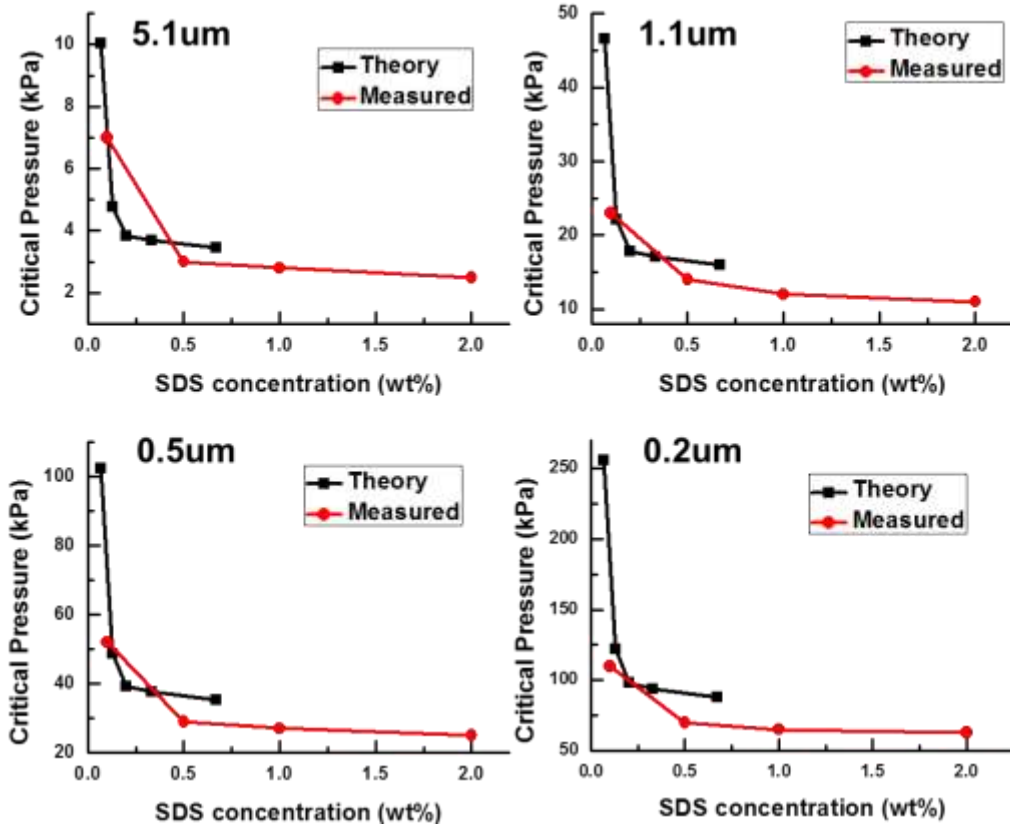

**Figure S4.** Comparison of calculated and measured  $P_c$  values. The calculated values were obtained using Equation (2). The interfacial tensions ( $\gamma$ ) at the (PS-toluene)/(water-SDS) interface were estimated depending on SDS concentrations.<sup>1</sup> We used the following assumptions for the estimate: (1)  $\gamma$  for PS-*b*-PB particles was the same as that of the PS particles; (2) the  $\gamma$  value was independent of the BCP concentration; (3)  $\cos \theta = 1$ .<sup>2,3</sup>

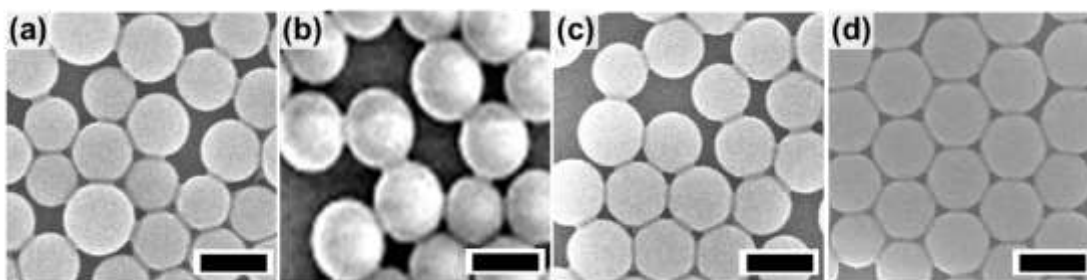

**Figure S5.** SEM images of BCP particles produced from the 1.1  $\mu\text{m}$  membrane at different stirring speeds. (a) 100 rpm; (b) 280 rpm; (c) 360 rpm; (d) 420 rpm. Scale bars are 1  $\mu\text{m}$ . The SDS concentration was fixed at 0.1 wt%.

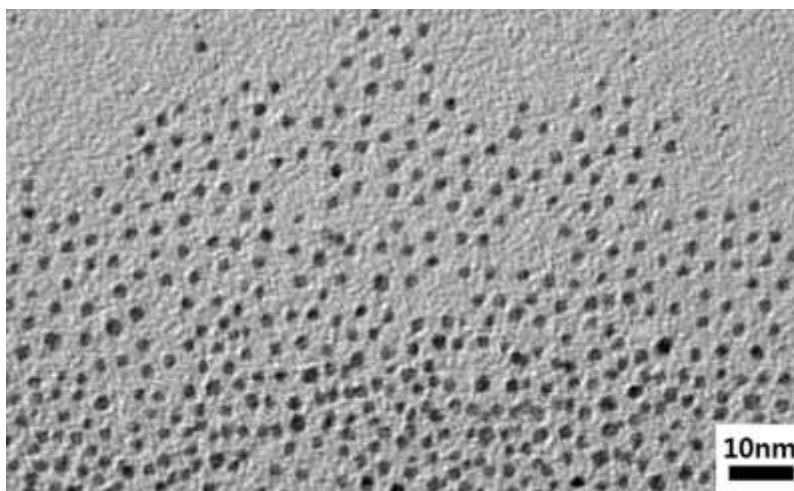

**Figure S6.** TEM image of oleylamine-capped Au nanoparticles:  $3.0 \pm 0.32$  nm in diameter

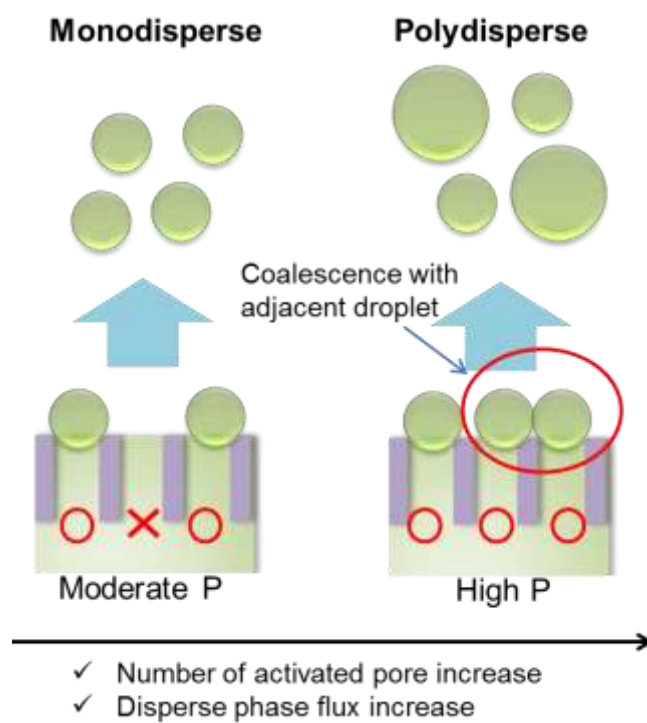

**Scheme S1.** Illustration of the droplet coalescence at higher operation pressure (P).

**Table S1.** Domain spacing ( $L$ ), commensurability ( $D/L$ ), and number of PB layers in onion-like BCP particles consisting of different molecular weights ( $M_n$ ) of PS-*b*-PB polymers.

| Membrane<br>pore size<br>( $\mu\text{m}$ ) | $M_n$ of PS- <i>b</i> -PB<br>(kg/mol) | $L$<br>(nm) | $D/L$ | Number of<br>PB layers |
|--------------------------------------------|---------------------------------------|-------------|-------|------------------------|
| 1.1                                        | 112-104                               | 70          | 14.1  | 7.5                    |
|                                            | 67-75                                 | 54          | 17.2  | 8.5                    |
|                                            | 20-22                                 | 28          | 36.6  | 17.5                   |
| 0.5                                        | 112-104                               | 70          | 6.0   | 3.5                    |
|                                            | 67-75                                 | 54          | 9.3   | 4.5                    |
|                                            | 20-22                                 | 28          | 16.6  | 7.5                    |

**Table S2.** Particle diameters and their distributions produced at different  $P$  values. The BCP particles were produced at 0.1 wt% SDS for 1.1  $\mu\text{m}$ , 0.5  $\mu\text{m}$ , and 0.2  $\mu\text{m}$  membranes, and 0.5 wt% SDS for 5.1  $\mu\text{m}$  membrane.

| Membrane pore size ( $\mu\text{m}$ ) | P (kPa) | P/Pc | Diameter ( $\mu\text{m}$ ) | C.V. (%) |
|--------------------------------------|---------|------|----------------------------|----------|
| 5.1                                  | 4       | 1.33 | 4.366                      | 8.48     |
|                                      | 7       | 2.33 | 4.596                      | 11.01    |
|                                      | 10      | 3.33 | 3.673                      | 11.25    |
|                                      | 13      | 4.33 | 3.226                      | 45.00    |
| 1.1                                  | 30      | 1.33 | 0.986                      | 9.25     |
|                                      | 53      | 2.33 | 0.994                      | 11.49    |
|                                      | 76      | 3.33 | 1.025                      | 9.00     |
|                                      | 99      | 4.33 | 0.984                      | 24.88    |
| 0.5                                  | 69      | 1.33 | 0.429                      | 9.99     |
|                                      | 121     | 2.33 | 0.433                      | 8.12     |
|                                      | 173     | 3.33 | 0.492                      | 24.16    |
|                                      | 225     | 4.33 | 0.476                      | 23.06    |
| 0.2                                  | 145     | 1.31 | 0.201                      | 10.11    |
|                                      | 256     | 2.33 | 0.197                      | 13.70    |
|                                      | 366     | 3.33 | 0.263                      | 32.01    |
|                                      | 476     | 4.33 | 0.247                      | 19.23    |

**Table S3.** Particle diameters and their distributions produced at different SDS concentrations.

| Membrane pore size (μm) | SDS    | P(kPa) | P <sub>c</sub> | P/P <sub>c</sub> | Diameter (μm) | C.V. (%) |
|-------------------------|--------|--------|----------------|------------------|---------------|----------|
| 5.1um                   | 0.1wt% | 9      | 7              | 1.28             | 3.317         | 33.67    |
|                         | 0.5wt% | 4      | 3              | 1.33             | 4.366         | 8.48     |
|                         | 1wt%   | 3.3    | 2.8            | 1.17             | 3.690         | 9.46     |
|                         | 2wt%   | 2.8    | 2.5            | 1.12             | 3.655         | 8.56     |
| 1.1um                   | 0.1wt% | 30     | 23             | 1.33             | 0.986         | 9.25     |
|                         | 0.5wt% | 19     | 14             | 1.36             | 1.004         | 9.11     |
|                         | 1wt%   | 17     | 12             | 1.42             | 1.013         | 10.16    |
|                         | 2wt%   | 14     | 11             | 1.27             | 0.961         | 8.96     |
| 0.5um                   | 0.1wt% | 69     | 52             | 1.33             | 0.429         | 9.99     |
|                         | 0.5wt% | 38     | 29             | 1.31             | 0.334         | 10.77    |
|                         | 1wt%   | 35     | 27             | 1.30             | 0.355         | 9.99     |
|                         | 2wt%   | 32     | 25             | 1.28             | 0.374         | 9.91     |
| 0.2um                   | 0.1wt% | 145    | 110            | 1.31             | 0.201         | 10.11    |
|                         | 0.5wt% | 90     | 70             | 1.28             | 0.203         | 12.31    |
|                         | 1wt%   | 85     | 65             | 1.30             | 0.207         | 9.68     |
|                         | 2wt%   | 85     | 63             | 1.34             | 0.204         | 8.33     |

**Table S4.** Particle diameters and their distributions produced at different stirring speeds from 100 to 420 rpm. SDS concentration was fixed at 0.1 wt%, and  $P/P_c$  was fixed at 1.33. Diameter and CV value decreased slightly as stirring speed increased, but the differences were small.

| Membrane pore size ( $\mu\text{m}$ ) | Stirring Speed (rpm) | Diameter ( $\mu\text{m}$ ) | C.V. (%) |
|--------------------------------------|----------------------|----------------------------|----------|
| 1.1                                  | 100                  | 0.938                      | 9.38     |
|                                      | 280                  | 0.986                      | 9.25     |
|                                      | 360                  | 0.913                      | 8.65     |
|                                      | 420                  | 0.892                      | 7.40     |

## REFERENCES

- (1) Saito, N.; Kagari, Y.; Okubo, M. Effect of Colloidal Stabilizer on the Shape of Polystyrene/poly(methyl Methacrylate) Composite Particles Prepared in Aqueous Medium by the Solvent Evaporation Method. *Langmuir* **2006**, 22, 9397–9402.
- (2) Gijsbertsen-Abrahamse, A. J.; Van Der Padt, A.; Boom, R. M. Influence of Membrane Morphology on Pore Activation in Membrane Emulsification. *J. Membr. Sci.* **2003**, 217, 141–150.
- (3) Gijsbertsen-Abrahamse, A. J.; Van Der Padt, A.; Boom, R. M. Status of Cross-Flow Membrane Emulsification and Outlook for Industrial Application. *J. Membr. Sci.* **2004**, 230, 149–159.
